# Supplementary material for: Differentially Expressed Genes Identification of Kohlrabi Seedlings (Brassica oleracea var. caulorapa L.) under Polyethylene Glycol Osmotic Stress and AP2/ERF Transcription Factor Family Analysis
Source: MDPI journal article supplement (doi:10.3390/plants13081167), 2024-04-22
Supplement: s1 [file s1]

**Table S1.** Summary of kohlrabi seedlings RNA-sequencing data under polyethylene glycol 6000-simulated drought stress in this study.

| Sample | Raw Reads | Clean Reads | Clean Base(G) | Q20(%) | Q30(%) | GC Content(%) |
|--------|-----------|-------------|---------------|--------|--------|---------------|
| CK-1   | 51073388  | 48270724    | 7.24          | 98.03  | 94.16  | 47.35         |
| CK-2   | 47026420  | 44666012    | 6.70          | 98.12  | 94.36  | 47.30         |
| CK-3   | 51183882  | 48709548    | 7.31          | 98.14  | 94.44  | 47.42         |
| 12h-1  | 45262254  | 42976838    | 6.45          | 98.40  | 95.12  | 47.10         |
| 12h-2  | 49158404  | 45739148    | 6.86          | 97.84  | 93.91  | 46.96         |
| 12h-3  | 48043564  | 45358166    | 6.80          | 98.00  | 94.11  | 47.09         |
| 24h-1  | 46365532  | 44650646    | 6.70          | 98.20  | 94.53  | 47.08         |
| 24h-2  | 51795110  | 50095338    | 7.51          | 98.28  | 94.75  | 47.27         |
| 24h-3  | 53167538  | 51045458    | 7.66          | 98.07  | 94.29  | 47.58         |
| 48h-1  | 46653846  | 43780842    | 6.57          | 98.16  | 94.60  | 46.38         |
| 48h-2  | 45548446  | 42914504    | 6.44          | 98.12  | 94.41  | 47.01         |
| 48h-3  | 53042244  | 50114348    | 7.52          | 98.03  | 94.14  | 47.26         |
