# Supplementary material for: Differentially Expressed Genes Identification of Kohlrabi Seedlings (Brassica oleracea var. caulorapa L.) under Polyethylene Glycol Osmotic Stress and AP2/ERF Transcription Factor Family Analysis
Source: MDPI journal article supplement (doi:10.3390/plants13081167), 2024-04-22
Supplement: s1 [file s1]

**Table S7.** Physicochemical property analysis of 151 *BocAP2/ERFs* in kohlrabi.

| Gene ID         | Sequence ID          | Accession number of NCBI Reference Sequence | Length of cDNA | Number of amino acids (aa) | Molecular Weight (Da) | Theoretical pI | Total number of atoms | Aliphatic index | Grand average of hydropathicity |
|-----------------|----------------------|---------------------------------------------|----------------|----------------------------|-----------------------|----------------|-----------------------|-----------------|---------------------------------|
| <i>BocERF1</i>  | Cluster-17807.98657  | XM_013757078.1                              | 1305           | 434                        | 47518.81              | 8.50           | 6545                  | 57.88           | -0.685                          |
| <i>BocERF2</i>  | Cluster-8561.0       | XM_013759052.1                              | 1323           | 440                        | 48877.67              | 8.67           | 6760                  | 62.98           | -0.593                          |
| <i>BocERF3</i>  | Cluster-17807.113651 | XM_013763491.1                              | 570            | 189                        | 21216.39              | 5.89           | 2905                  | 46.56           | -0.921                          |
| <i>BocERF4</i>  | Cluster-17807.67803  | XM_013774334.1                              | 1062           | 353                        | 39674.11              | 4.99           | 5476                  | 58.67           | -0.778                          |
| <i>BocERF5</i>  | Cluster-17807.21654  | XM_013775771.1                              | 1221           | 406                        | 45177.47              | 8.55           | 6283                  | 62.78           | -0.787                          |
|                 | Cluster-17807.108274 |                                             |                |                            |                       |                |                       |                 |                                 |
|                 | Cluster-17807.108275 |                                             |                |                            |                       |                |                       |                 |                                 |
|                 | Cluster-17807.15765  |                                             |                |                            |                       |                |                       |                 |                                 |
| <i>BocERF6</i>  | Cluster-17807.119527 | XM_013880612.3                              | 819            | 272                        | 30696.37              | 4.99           | 4252                  | 69.26           | -0.521                          |
| <i>BocERF7</i>  | Cluster-17807.97937  | NM_001315928.1                              | 669            | 222                        | 24734.94              | 9.12           | 3483                  | 70.32           | -0.652                          |
| <i>BocERF8</i>  | Cluster-17807.109356 | NM_001316282.1                              | 621            | 206                        | 23288.72              | 4.94           | 3214                  | 63.01           | -0.787                          |
|                 | Cluster-17807.47931  |                                             |                |                            |                       |                |                       |                 |                                 |
| <i>BocERF9</i>  | Cluster-17807.108193 | XM_006297821.2                              | 1158           | 385                        | 43267.81              | 5.06           | 5938                  | 50.73           | -0.846                          |
| <i>BocERF10</i> | Cluster-17807.23530  | XM_009109191.2                              | 468            | 155                        | 17556.09              | 10.00          | 2476                  | 72.52           | -0.646                          |
| <i>BocERF11</i> | Cluster-13788.0      | XM_009135261.3                              | 1269           | 422                        | 46694.43              | 8.80           | 6498                  | 64.34           | -0.694                          |
|                 | Cluster-17807.11695  |                                             |                |                            |                       |                |                       |                 |                                 |
| <i>BocERF12</i> | Cluster-17807.111848 | XM_009148142.3                              | 1140           | 379                        | 41844.10              | 4.89           | 5725                  | 49.50           | -0.793                          |
| <i>BocERF13</i> | Cluster-17807.14842  | XM_013728592.1                              | 735            | 244                        | 27341.80              | 5.32           | 3828                  | 72.38           | -0.631                          |
| <i>BocERF14</i> | Cluster-17807.75233  | XM_013728852.1                              | 567            | 188                        | 20415.04              | 5.44           | 2836                  | 69.10           | -0.408                          |
| <i>BocERF15</i> | Cluster-17807.123753 | XM_013731560.1                              | 1146           | 381                        | 42105.37              | 4.98           | 5764                  | 50.29           | -0.806                          |
| <i>BocERF16</i> | Cluster-17807.67619  | XM_013731560.1                              | 1131           | 376                        | 41436.72              | 4.88           | 5669                  | 48.62           | -0.757                          |
| <i>BocERF17</i> | Cluster-17807.67620  | XM_013731560.1                              | 1140           | 379                        | 41777.10              | 4.98           | 5720                  | 49.53           | -0.782                          |
| <i>BocERF18</i> | Cluster-19609.0      | XM_013734904.1                              | 768            | 255                        | 28706.88              | 5.07           | 3972                  | 58.59           | -0.850                          |
| <i>BocERF19</i> | Cluster-26482.0      | XM_013734904.1                              | 774            | 257                        | 28861.05              | 5.20           | 3993                  | 60.04           | -0.817                          |
| <i>BocERF20</i> | Cluster-12843.0      | XM_013736990.1                              | 552            | 183                        | 20061.29              | 5.71           | 2739                  | 57.16           | -0.502                          |
| <i>BocERF21</i> | Cluster-17807.103870 | XM_013737154.1                              | 1005           | 334                        | 36666.01              | 5.68           | 5095                  | 68.20           | -0.494                          |
|                 | Cluster-17807.28353  |                                             |                |                            |                       |                |                       |                 |                                 |
| <i>BocERF22</i> | Cluster-17807.111305 | XM_013738045.1                              | 816            | 271                        | 30222.04              | 5.06           | 4222                  | 76.68           | -0.441                          |
|                 | Cluster-17807.119164 |                                             |                |                            |                       |                |                       |                 |                                 |
| <i>BocERF23</i> | Cluster-17807.111093 | XM_013738368.1                              | 771            | 256                        | 28556.77              | 5.75           | 3994                  | 66.64           | -0.709                          |
| <i>BocERF24</i> | Cluster-17807.45964  | XM_013739850.1                              | 561            | 186                        | 21008.19              | 5.56           | 2903                  | 58.28           | -0.996                          |
|                 | Cluster-17807.98579  |                                             |                |                            |                       |                |                       |                 |                                 |
| <i>BocERF25</i> | Cluster-20522.0      | XM_013741144.1                              | 786            | 261                        | 29773.79              | 5.10           | 4065                  | 52.76           | -0.903                          |

|          |                      |                |      |     |          |      |      |       |        |
|----------|----------------------|----------------|------|-----|----------|------|------|-------|--------|
| BocERF26 | Cluster-20681.0      | XM_013741329.1 | 480  | 159 | 17592.91 | 7.04 | 2444 | 68.74 | -0.715 |
| BocERF27 | Cluster-17807.7585   | XM_013741497.1 | 456  | 151 | 16380.10 | 6.27 | 2234 | 65.89 | -0.415 |
| BocERF28 | Cluster-17807.74068  | XM_013743782.1 | 576  | 191 | 21007.17 | 7.10 | 2883 | 59.42 | -0.820 |
| BocERF29 | Cluster-17807.70200  | XM_013745251.1 | 489  | 162 | 18023.65 | 9.60 | 2530 | 71.79 | -0.511 |
| BocERF30 | Cluster-15258.0      | XM_013746533.1 | 1035 | 344 | 38331.13 | 9.47 | 5348 | 67.79 | -0.585 |
| BocERF31 | Cluster-17807.152397 | XM_013746533.1 | 1035 | 344 | 38398.19 | 9.53 | 5349 | 65.52 | -0.609 |
| BocERF32 | Cluster-17807.132655 | XM_013747492.1 | 597  | 198 | 21936.87 | 5.51 | 3047 | 68.08 | -0.475 |
|          | Cluster-17807.97987  |                |      |     |          |      |      |       |        |
| BocERF33 | Cluster-17807.126676 | XM_013747936.1 | 687  | 228 | 25924.54 | 4.89 | 3556 | 56.93 | -0.711 |
| BocERF34 | Cluster-17807.45997  | XM_013748703.1 | 732  | 243 | 27130.37 | 5.41 | 3783 | 67.45 | -0.696 |
| BocERF35 | Cluster-17807.63901  | XM_013748703.1 | 732  | 243 | 27129.38 | 5.54 | 3784 | 67.45 | -0.696 |
| BocERF36 | Cluster-17807.19103  | XM_013749655.1 | 540  | 179 | 19828.86 | 4.63 | 2701 | 51.28 | -0.570 |
| BocERF37 | Cluster-17807.78121  | XM_013751691.1 | 663  | 220 | 24387.46 | 9.30 | 3420 | 70.09 | -0.665 |
| BocERF38 | Cluster-17807.145380 | XM_013753923.1 | 864  | 287 | 31479.61 | 8.56 | 4431 | 79.97 | -0.403 |
|          | Cluster-17807.147440 |                |      |     |          |      |      |       |        |
| BocERF39 | Cluster-17807.112787 | XM_013755124.1 | 1092 | 363 | 40562.85 | 4.92 | 5573 | 53.28 | -0.805 |
| BocERF40 | Cluster-17807.72481  | XM_013755124.1 | 1092 | 363 | 40530.79 | 4.92 | 5572 | 54.08 | -0.799 |
| BocERF41 | Cluster-17807.136204 | XM_013755131.1 | 1065 | 354 | 39472.76 | 5.03 | 5435 | 53.79 | -0.767 |
| BocERF42 | Cluster-17807.56242  | XM_013755131.1 | 1053 | 350 | 39335.55 | 5.32 | 5404 | 51.06 | -0.783 |
| BocERF43 | Cluster-17807.58663  | XM_013755131.1 | 1062 | 353 | 39399.77 | 5.09 | 5429 | 54.79 | -0.759 |
| BocERF44 | Cluster-17807.56240  | XM_013755131.1 | 1062 | 353 | 39353.68 | 5.09 | 5425 | 55.61 | -0.753 |
| BocERF45 | Cluster-17807.56241  | XM_013755131.1 | 1062 | 353 | 39367.71 | 5.09 | 5428 | 55.61 | -0.753 |
| BocERF46 | Cluster-17807.134025 | XM_013755131.1 | 1062 | 353 | 39309.65 | 5.08 | 5416 | 54.79 | -0.758 |
|          | Cluster-17807.59127  |                |      |     |          |      |      |       |        |
| BocERF47 | Cluster-17807.84610  | XM_013755972.1 | 540  | 179 | 20250.39 | 5.83 | 2799 | 56.15 | -0.980 |
| BocERF48 | Cluster-17807.90768  | XM_013756535.1 | 768  | 255 | 28554.81 | 7.73 | 3958 | 62.04 | -0.780 |
| BocERF49 | Cluster-17807.116927 | XM_013757077.1 | 1365 | 454 | 49647.24 | 8.21 | 6847 | 60.90 | -0.649 |
| BocERF50 | Cluster-17807.116928 | XM_013757077.1 | 1365 | 454 | 49674.35 | 8.21 | 6858 | 62.38 | -0.627 |
| BocERF51 | Cluster-17807.43103  | XM_013757077.1 | 1365 | 454 | 49656.25 | 8.21 | 6847 | 60.90 | -0.648 |
|          | Cluster-17807.116925 |                |      |     |          |      |      |       |        |
| BocERF52 | Cluster-17807.116926 | XM_013757077.1 | 1365 | 454 | 49561.19 | 8.21 | 6842 | 62.18 | -0.627 |
| BocERF53 | Cluster-17807.104480 | XM_013757078.1 | 1305 | 434 | 47518.81 | 8.50 | 6545 | 57.88 | -0.685 |
| BocERF54 | Cluster-17807.116929 | XM_013757078.1 | 1305 | 434 | 47489.86 | 8.71 | 6548 | 59.22 | -0.656 |
|          | Cluster-17807.155014 |                |      |     |          |      |      |       |        |
| BocERF55 | Cluster-17807.140788 | XM_013759052.1 | 1323 | 440 | 48763.52 | 8.47 | 6745 | 63.43 | -0.590 |
| BocERF56 | Cluster-17807.19661  | XM_013759052.1 | 1323 | 440 | 48793.55 | 8.47 | 6749 | 63.20 | -0.596 |

|          |                      |                |      |     |          |      |      |       |        |
|----------|----------------------|----------------|------|-----|----------|------|------|-------|--------|
| BocERF57 | Cluster-17807.3481   | XM_013759052.1 | 1323 | 440 | 48745.49 | 8.47 | 6747 | 64.32 | -0.584 |
| BocERF58 | Cluster-17807.68685  | XM_013759052.1 | 1323 | 440 | 48877.67 | 8.67 | 6760 | 62.98 | -0.593 |
| BocERF59 | Cluster-17807.142693 | XM_013759059.1 | 1287 | 428 | 47144.87 | 8.86 | 6543 | 64.74 | -0.562 |
| BocERF60 | Cluster-17807.55305  | XM_013759059.1 | 1287 | 428 | 47172.85 | 8.70 | 6536 | 64.30 | -0.559 |
| BocERF61 | Cluster-17807.68686  | XM_013759059.1 | 1287 | 428 | 47135.83 | 8.71 | 6534 | 63.83 | -0.565 |
| BocERF62 | Cluster-17807.33829  | XM_013760691.1 | 465  | 154 | 17127.09 | 6.42 | 2369 | 66.62 | -0.515 |
| BocERF63 | Cluster-17807.67932  | XM_013760154.1 | 933  | 310 | 34420.74 | 8.70 | 4797 | 66.48 | -0.541 |
| BocERF64 | Cluster-17807.149896 | XM_013766827.1 | 1284 | 427 | 46899.36 | 8.83 | 6518 | 61.10 | -0.757 |
|          | Cluster-17807.149892 |                |      |     |          |      |      |       |        |
|          | Cluster-17807.149893 |                |      |     |          |      |      |       |        |
| BocERF65 | Cluster-17807.149895 | XM_013766827.1 | 1278 | 425 | 46979.65 | 8.79 | 6537 | 62.73 | -0.725 |
| BocERF66 | Cluster-17807.150914 | XM_013766827.1 | 1284 | 427 | 46872.34 | 8.83 | 6515 | 61.10 | -0.750 |
| BocERF67 | Cluster-17807.164    | XM_013766873.1 | 762  | 253 | 28235.72 | 5.23 | 3927 | 65.61 | -0.667 |
| BocERF68 | Cluster-17807.40114  | XM_013766873.1 | 762  | 253 | 28204.74 | 5.00 | 3928 | 69.84 | -0.581 |
| BocERF69 | Cluster-17807.119526 | XM_013770131.1 | 810  | 269 | 30408.05 | 5.17 | 4220 | 68.96 | -0.575 |
| BocERF70 | Cluster-17807.148103 | XM_013770131.1 | 819  | 272 | 30722.50 | 5.17 | 4264 | 67.13 | -0.521 |
| BocERF71 | Cluster-17807.145709 | XM_013770553.1 | 831  | 276 | 30091.12 | 5.52 | 4151 | 61.92 | -0.572 |
| BocERF72 | Cluster-17807.130167 | XM_013774334.1 | 1047 | 348 | 39117.47 | 4.94 | 5391 | 58.39 | -0.778 |
| BocERF73 | Cluster-17807.90406  | XM_013774335.1 | 1038 | 345 | 38859.24 | 4.94 | 5359 | 58.90 | -0.771 |
| BocERF74 | Cluster-17807.102609 | XM_013774807.1 | 954  | 317 | 35290.94 | 5.09 | 4837 | 50.88 | -0.734 |
|          | Cluster-17807.63424  |                |      |     |          |      |      |       |        |
| BocERF75 | Cluster-17807.107222 | XM_013774807.1 | 954  | 317 | 35306.94 | 5.09 | 4838 | 50.57 | -0.742 |
| BocERF76 | Cluster-17807.108276 | XM_013775770.1 | 1236 | 411 | 45798.17 | 8.69 | 6368 | 62.02 | -0.790 |
| BocERF77 | Cluster-17807.19575  | XM_013775770.1 | 1254 | 417 | 46186.64 | 8.69 | 6427 | 63.45 | -0.762 |
| BocERF78 | Cluster-17807.108277 | XM_013775771.1 | 1221 | 406 | 45170.43 | 8.55 | 6278 | 61.82 | -0.783 |
|          | Cluster-17807.108279 |                |      |     |          |      |      |       |        |
| BocERF79 | Cluster-11428.0      | XM_013782826.1 | 831  | 276 | 31207.79 | 4.95 | 4320 | 69.31 | -0.611 |
| BocERF80 | Cluster-17807.105515 | XM_013783142.1 | 693  | 230 | 25485.05 | 4.94 | 3513 | 61.91 | -0.680 |
| BocERF81 | Cluster-17807.132959 | XM_013782268.1 | 783  | 260 | 29495.06 | 5.59 | 4100 | 61.92 | -0.690 |
| BocERF82 | Cluster-17807.159090 | XM_013783150.1 | 660  | 219 | 24321.89 | 4.90 | 3358 | 64.57 | -0.618 |
| BocERF83 | Cluster-621.0        | XM_013779125.1 | 651  | 216 | 24431.63 | 8.67 | 3395 | 59.63 | -0.870 |
| BocERF84 | Cluster-17807.77102  | XM_013794541.3 | 987  | 328 | 36210.40 | 6.07 | 5005 | 59.30 | -0.566 |
|          | Cluster-17807.80319  |                |      |     |          |      |      |       |        |
| BocERF85 | Cluster-17807.82175  | XM_013794541.3 | 966  | 321 | 35449.55 | 6.00 | 4899 | 59.38 | -0.555 |
| BocERF86 | Cluster-12737.0      | XM_013814510.3 | 882  | 293 | 33222.08 | 6.46 | 4573 | 51.98 | -0.808 |
| BocERF87 | Cluster-17807.4752   | XM_013800927.3 | 834  | 277 | 31680.29 | 6.61 | 4357 | 51.44 | -0.886 |

|           |                      |                |      |     |          |      |      |       |        |
|-----------|----------------------|----------------|------|-----|----------|------|------|-------|--------|
| BocERF88  | Cluster-22256.0      | XM_013799429.3 | 693  | 230 | 25680.45 | 4.62 | 3545 | 65.74 | -0.548 |
| BocERF89  | Cluster-23151.0      | XM_013814459.3 | 741  | 246 | 27714.1  | 5.9  | 3877 | 75.77 | -0.633 |
| BocERF90  | Cluster-7744.0       | XM_013799772.3 | 573  | 190 | 20673.15 | 4.97 | 2833 | 57.68 | -0.501 |
| BocERF91  | Cluster-17807.7192   | XM_013826556.3 | 789  | 262 | 29910.41 | 7.23 | 4141 | 66.34 | -0.826 |
| BocERF92  | Cluster-17807.115520 | XM_013837776.3 | 771  | 256 | 28588.72 | 5.43 | 3989 | 66.64 | -0.685 |
| BocERF93  | Cluster-17807.48648  | XM_013842689.3 | 783  | 260 | 29416.93 | 5.59 | 4093 | 63.42 | -0.694 |
| BocERF94  | Cluster-17807.6879   | XM_013850443.3 | 966  | 321 | 35696.26 | 5.37 | 4886 | 53.58 | -0.693 |
| BocERF95  | Cluster-17807.7524   | XM_013849742.3 | 687  | 228 | 25187.98 | 4.69 | 3474 | 65.88 | -0.431 |
| BocERF96  | Cluster-17807.43104  | XM_013859430.3 | 1299 | 432 | 47500.02 | 8.71 | 6563 | 62.18 | -0.614 |
| BocERF97  | Cluster-17807.97897  | XM_013859430.3 | 1299 | 432 | 47512.13 | 8.87 | 6570 | 63.08 | -0.6   |
| BocERF98  | Cluster-17807.32362  | XM_013880612.3 | 831  | 276 | 31201.74 | 4.95 | 4314 | 67.9  | -0.603 |
|           | Cluster-17807.148102 |                |      |     |          |      |      |       |        |
| BocERF99  | Cluster-17807.26909  | XM_013880959.3 | 1143 | 380 | 41846.12 | 4.94 | 5727 | 49.13 | -0.798 |
| BocERF100 | Cluster-17807.73973  | XM_013880959.3 | 1143 | 380 | 41913.3  | 4.98 | 5745 | 50.92 | -0.773 |
|           | Cluster-17807.86378  |                |      |     |          |      |      |       |        |
| BocERF101 | Cluster-17807.158542 | XM_013881405.3 | 1035 | 344 | 38257.94 | 9.41 | 5328 | 66.37 | -0.601 |
| BocERF102 | Cluster-17807.154886 | XM_018637720.2 | 987  | 328 | 35960.77 | 5.59 | 4959 | 58.11 | -0.658 |
|           | Cluster-17807.28766  |                |      |     |          |      |      |       |        |
|           | Cluster-17807.28767  |                |      |     |          |      |      |       |        |
|           | Cluster-17807.3601   |                |      |     |          |      |      |       |        |
|           | Cluster-17807.9257   |                |      |     |          |      |      |       |        |
| BocERF103 | Cluster-17807.7525   | XM_033286625.1 | 708  | 235 | 25936.45 | 4.65 | 3575 | 61.4  | -0.57  |
| BocERF104 | Cluster-17807.25925  | XM_048770003.1 | 933  | 310 | 33777.88 | 7.8  | 4725 | 76.35 | -0.4   |
| BocERF105 | Cluster-17807.147387 | XM_048775894.1 | 1224 | 407 | 44685.89 | 5.7  | 6108 | 55.9  | -0.711 |
|           | Cluster-17807.147397 |                |      |     |          |      |      |       |        |
| BocERF106 | Cluster-17807.154001 | XM_048777716.1 | 831  | 269 | 30064.83 | 5.28 | 4182 | 68.92 | -0.518 |
|           | Cluster-17807.32361  |                |      |     |          |      |      |       |        |
| BocERF107 | Cluster-17807.27028  | XM_048777716.1 | 831  | 269 | 30147.91 | 5.28 | 4195 | 68.92 | -0.531 |
| BocERF108 | Cluster-17807.126599 | XM_048778063.1 | 588  | 197 | 21881.98 | 6.55 | 2996 | 57.11 | -0.959 |
|           | Cluster-17807.32997  |                |      |     |          |      |      |       |        |
| BocAP2-1  | Cluster-17807.147385 | XM_013767819.1 | 1245 | 414 | 45173.61 | 6.22 | 6181 | 55.22 | -0.67  |
| BocAP2-2  | Cluster-17807.147389 | XM_013878360.3 | 1254 | 417 | 45598.91 | 6.61 | 6225 | 50.14 | -0.75  |
| BocAP2-3  | Cluster-17807.84134  | XM_009105449.3 | 1365 | 454 | 49530.13 | 6.48 | 6758 | 50.35 | -0.782 |
|           | Cluster-17807.62454  |                |      |     |          |      |      |       |        |
| BocAP2-4  | Cluster-17807.62453  | XM_009105450.3 | 1320 | 439 | 47816.23 | 7.09 | 6520 | 48.52 | -0.817 |
| BocAP2-5  | Cluster-17807.138105 | XM_013732410.1 | 927  | 308 | 35001.58 | 7.69 | 4826 | 53.31 | -0.952 |

|           |                      |                |      |     |          |      |      |       |        |
|-----------|----------------------|----------------|------|-----|----------|------|------|-------|--------|
| BocAP2-6  | Cluster-17807.21178  | XM_013732410.1 | 927  | 308 | 35041.69 | 7.69 | 4837 | 54.9  | -0.93  |
| BocAP2-7  | Cluster-17807.134397 | XM_013737986.1 | 1680 | 559 | 61778.02 | 6.84 | 8432 | 56.21 | -0.703 |
| BocAP2-8  | Cluster-17807.134400 | XM_013737986.1 | 1680 | 559 | 61876.08 | 6.82 | 8441 | 55.51 | -0.72  |
| BocAP2-9  | Cluster-17807.157237 | XM_013738114.1 | 1086 | 361 | 40835.46 | 9.11 | 5632 | 55.12 | -0.831 |
|           | Cluster-17807.102797 |                |      |     |          |      |      |       |        |
|           | Cluster-17807.107776 |                |      |     |          |      |      |       |        |
|           | Cluster-17807.132097 |                |      |     |          |      |      |       |        |
|           | Cluster-17807.102796 |                |      |     |          |      |      |       |        |
|           | Cluster-17807.30266  |                |      |     |          |      |      |       |        |
|           | Cluster-17807.30267  |                |      |     |          |      |      |       |        |
|           | Cluster-17807.58977  |                |      |     |          |      |      |       |        |
|           | Cluster-17807.13200  |                |      |     |          |      |      |       |        |
| BocAP2-10 | Cluster-11338.0      | XM_013751793.1 | 1767 | 588 | 65562.77 | 6.22 | 8957 | 59.18 | -0.773 |
| BocAP2-11 | Cluster-17807.11162  | XM_013763251.1 | 1668 | 555 | 61816.26 | 7.82 | 8462 | 56.59 | -0.7   |
|           | Cluster-17807.36325  |                |      |     |          |      |      |       |        |
| BocAP2-12 | Cluster-28007.0      | XM_013763251.1 | 1668 | 555 | 61802.19 | 7.44 | 8455 | 56.59 | -0.699 |
| BocAP2-13 | Cluster-17807.147394 | XM_013767819.1 | 1239 | 412 | 45084.42 | 6.43 | 6159 | 50.75 | -0.728 |
| BocAP2-14 | Cluster-25753.0      | XM_013767843.1 | 1704 | 567 | 63688.79 | 6.29 | 8696 | 56.01 | -0.817 |
| BocAP2-15 | Cluster-25753.1      | XM_013767843.1 | 1713 | 570 | 63967.23 | 6.47 | 8743 | 56.58 | -0.789 |
| BocAP2-16 | Cluster-25753.4      | XM_013767843.1 | 1704 | 567 | 63726.8  | 6.24 | 8697 | 56.37 | -0.814 |
| BocAP2-17 | Cluster-17807.110560 | XM_013783234.1 | 1014 | 337 | 38162.08 | 6.48 | 5255 | 55.34 | -0.958 |
| BocAP2-18 | Cluster-17807.91274  | XM_013775779.1 | 1320 | 439 | 47652.97 | 6.73 | 6502 | 49.64 | -0.799 |
| BocAP2-19 | Cluster-8935.0       | XM_013823335.3 | 1701 | 566 | 63609.9  | 6.47 | 8701 | 57.31 | -0.795 |
| BocAP2-20 | Cluster-11675.0      | XM_013833245.3 | 1014 | 337 | 38162.08 | 6.48 | 5255 | 55.34 | -0.958 |
|           | Cluster-17807.55661  |                |      |     |          |      |      |       |        |
| BocAP2-21 | Cluster-17807.147390 | XM_013878360.3 | 1296 | 431 | 47272.81 | 6.08 | 6461 | 53.25 | -0.719 |
| BocAP2-22 | Cluster-17807.147392 | XM_013878360.3 | 1254 | 417 | 45598.91 | 6.61 | 6225 | 50.14 | -0.75  |
|           | Cluster-17807.147395 |                |      |     |          |      |      |       |        |
| BocAP2-23 | Cluster-17807.147400 | XM_013878360.3 | 1254 | 417 | 45584.89 | 6.61 | 6222 | 49.9  | -0.749 |
| BocAP2-24 | Cluster-17807.147402 | XM_013878360.3 | 1254 | 417 | 45583.98 | 6.61 | 6231 | 51.08 | -0.731 |
| BocAP2-25 | Cluster-17807.147412 | XM_013878360.3 | 1254 | 417 | 45320.72 | 6.14 | 6199 | 54.12 | -0.676 |
|           | Cluster-17807.147398 |                |      |     |          |      |      |       |        |
| BocAP2-26 | Cluster-17807.147411 | XM_013878360.3 | 1254 | 417 | 45612.98 | 6.84 | 6232 | 50.14 | -0.751 |
|           | Cluster-17807.157563 |                |      |     |          |      |      |       |        |
|           | Cluster-5730.0       |                |      |     |          |      |      |       |        |
| BocAP2-27 | Cluster-23389.0      | XM_018590187.2 | 1692 | 563 | 63087.26 | 6.12 | 8637 | 59.88 | -0.753 |

|                  |                      |                |      |     |          |      |      |       |        |
|------------------|----------------------|----------------|------|-----|----------|------|------|-------|--------|
| <i>BocAP2-28</i> | Cluster-17807.37117  | XM_019237897.1 | 732  | 243 | 27238.56 | 4.78 | 3712 | 57.9  | -0.813 |
| <i>BocAP2-29</i> | Cluster-17807.134396 | XM_022700009.2 | 1674 | 557 | 62008.39 | 7.83 | 8496 | 57.58 | -0.738 |
| <i>BocAP2-30</i> | Cluster-17807.134401 | XM_022700009.2 | 1674 | 557 | 62020.64 | 7.45 | 8510 | 58.64 | -0.682 |
| <i>BocAP2-31</i> | Cluster-17807.134404 | XM_022700009.2 | 1674 | 557 | 61939.41 | 7.82 | 8496 | 59.16 | -0.712 |
| <i>BocAP2-32</i> | Cluster-17807.134407 | XM_022700009.2 | 1674 | 557 | 61969.44 | 7.82 | 8500 | 59.16 | -0.712 |
| <i>BocAP2-33</i> | Cluster-17807.21179  | XM_048761637.1 | 918  | 305 | 34666.22 | 7.69 | 4781 | 53.21 | -0.961 |
| <i>BocAP2-34</i> | Cluster-17807.147396 | XM_048775893.1 | 1296 | 431 | 47182.78 | 6.43 | 6456 | 53.92 | -0.72  |
| <i>BocRAV1</i>   | Cluster-17807.82390  | XM_013782305.1 | 1026 | 341 | 38098.51 | 8.95 | 5303 | 67.36 | -0.628 |
| <i>BocRAV2</i>   | Cluster-17807.49649  | XM_013744055.1 | 1023 | 340 | 38033.54 | 9.46 | 5311 | 70.68 | -0.6   |
| <i>BocRAV3</i>   | Cluster-17807.64403  | XM_013744055.1 | 1014 | 337 | 38007.62 | 9.04 | 5292 | 69.02 | -0.642 |
| <i>BocRAV4</i>   | Cluster-17807.132270 | XM_013763661.1 | 1032 | 343 | 38415.43 | 9.53 | 5389 | 74.08 | -0.475 |
| <i>BocRAV5</i>   | Cluster-17807.918    | XM_013763730.1 | 1050 | 349 | 39109.04 | 9.31 | 5484 | 69.46 | -0.628 |
| <i>BocRAV6</i>   | Cluster-17807.107998 | XM_013766842.1 | 1059 | 352 | 39460.37 | 9.36 | 5527 | 69.74 | -0.654 |
| <i>BocRAV7</i>   | Cluster-17807.36555  | XM_013766842.1 | 1059 | 352 | 39529.56 | 9.24 | 5533 | 68.64 | -0.657 |
| <i>BocRAV8</i>   | Cluster-17807.72819  | XM_013782456.1 | 1116 | 371 | 40869.18 | 9.41 | 5712 | 65.96 | -0.568 |
| <i>BocRAV9</i>   | Cluster-17807.87240  | XM_013789359.3 | 1035 | 344 | 38620.36 | 9.15 | 5394 | 69.13 | -0.647 |
